# Supplementary material for: Plasma membrane proteomic analysis of human Gastric Cancer tissues: revealing flotillin 1 as a marker for Gastric Cancer
Source: BMC Cancer. 2015 May 7;15:367. doi: 10.1186/s12885-015-1343-5 (PMC4525731; doi:10.1186/s12885-015-1343-5)
Supplement: Additional file 3: Table S3. — Raw IHC scores of climnical samples used in TMAS. [file 12885_2015_1343_MOESM3_ESM.xls]

## Sheet: raw IHC scores
		Supplementary Table 5 - Raw IHC scores of clinical samples used in TMAs
TMA ID	Sample ID			Sample ID
BC01114	A1	Cancer	57	A2	Normal	0
BC01114	A3	Cancer	0	A4	Normal	0		red - upregulated in matched cancer compared to normal					43
BC01114	A5	Cancer	78	A6	Normal	12
BC01114	A7	Cancer	0	A8	Normal	0		downregulated in matched cancer compared to normal: 35 (41%)					11
BC01114	A9	Cancer	49	A10	Normal	0
BC01114	B1	Cancer	0	B2	Normal	0		black - no difference between matched cancer and normal					31
BC01114	B3	Cancer	66	B4	Normal	6
BC01114	B5	Cancer	0	B6	Normal	0
BC01114	B7	Cancer	54	B8	Normal	7
BC01114	B9	Cancer	0	B10	Normal	0
BC01114	C1	Cancer	88	C2	Normal	0
BC01114	C3	Cancer	68	C4	Normal	0
BC01114	C5	Cancer	0	C6	Normal	0
BC01114	C7	Cancer	32	C8	Normal	0
BC01114	C9	Cancer	0	C10	Normal	0
BC01114	D1	Cancer	12	D2	Normal	34
BC01114	D3	Cancer	0	D4	Normal	0
BC01114	D5	Cancer	7	D6	Normal	30
BC01114	D7	Cancer	90	D8	Normal	3
BC01114	D9	Cancer	0	D10	Normal	0
BC01114	E1	Cancer	43	E2	Normal	0
BC01114	E3	Cancer	12	E4	Normal	55
BC01114	E5	Cancer	78	E6	Normal	0
BC01114	E9	Cancer	50	E10	Normal	0
BC01114	F1	Cancer	45	F2	Normal	0
BC01114	F3	Cancer	66	F4	Normal	0
BC01114	F9	Cancer	37	F10	Normal	69
BC01114	G1	Cancer	0	G2	Normal	0
BC01114	G3	Cancer	34	G4	Normal	0
BC01114	G5	Cancer	0	G6	Normal	59
BC01114	G7	Cancer	63	G8	Normal	0
BC01114	G9	Cancer	0	G10	Normal	0
BC01114	H1	Cancer	29	H2	Normal	2
BC01114	E7	Cancer	0	E8	Normal	0
BC01114	H3	Cancer	38	H4	Normal	0
BC01114	H5	Cancer	35	H6	Normal	0
BC01114	H7	Cancer	0	H8	Normal	0
BC01114	H9	Cancer	67	H10	Normal	5
BC01114	I1	Cancer	0	I2	Normal	0
ST801	A1	Cancer	52	A2	Normal	0
ST801	A3	Cancer	28	A4	Normal	67
ST801	A5	Cancer	0	A6	Normal	0
ST801	A7	Cancer	46	A8	Normal	0
ST801	A9	Cancer	49	A10	Normal	0
ST801	B1	Cancer	0	B2	Normal	7
ST801	B3	Cancer	34	B4	Normal	0
ST801	B5	Cancer	24	B6	Normal	0
ST801	B7	Cancer	78	B8	Normal	12
ST801	B9	Cancer	67	B10	Normal	0
ST801	C1	Cancer	80	C2	Normal	3
ST801	C3	Cancer	0	C4	Normal	0
ST801	C5	Cancer	50	C6	Normal	3
ST801	C7	Cancer	0	C8	Normal	0
ST801	C9	Cancer	33	C10	Normal	88
ST801	D1	Cancer	0	D2	Normal	0
ST801	D3	Cancer	27	D4	Normal	0
ST801	D5	Cancer	48	D6	Normal	0
ST801	D7	Cancer	0	D8	Normal	0
ST801	D9	Cancer	0	D10	Normal	0
ST801	E1	Cancer	72	E2	Normal	2
ST801	E3	Cancer	79	E4	Normal	0
ST801	E5	Cancer	66	E6	Normal	0
ST801	E7	Cancer	0	E8	Normal	0
ST801	E9	Cancer	0	E10	Normal	10
ST801	F1	Cancer	49	F2	Normal	0
ST801	F3	Cancer	0	F4	Normal	29
ST801	F5	Cancer	0	F6	Normal	0
ST801	F7	Cancer	0	F8	Normal	0
ST801	F9	Cancer	60	F10	Normal	0
ST801	G1	Cancer	82	G2	Normal	0
ST801	G3	Cancer	0	G4	Normal	23
ST801	G5	Cancer	0	G6	Normal	0
ST801	G7	Cancer	40	G8	Normal	0
ST801	G9	Cancer	95	G10	Normal	0
ST801	H1	Cancer	63	H2	Normal	0
ST801	H3	Cancer	0	H4	Normal	0
ST801	H5	Cancer	47	H6	Normal	0
ST801	H7	Cancer	0	H8	Normal	0
ST801	H9	Cancer	60	H10	Normal	0
BC01114	F5	Cancer	0	F6	Normal	0
BC01114	F7	Cancer	0	F8	Normal	0
BC01114	I3	Cancer	68	I4	Normal	0
BC01114	I5	Cancer	65	I6	Normal	0
BC01114	I7	Cancer	0	I8	Normal	0
BC01114	I9	Cancer	0	I10	Normal	0
				J1	Normal	0
				J2	Normal	0
				J3	Normal	0
				J4	Normal	0
				J5	Normal	0
				J6	Normal	0
				J7	Normal	0
				J8	Normal	0
				J9	Normal	0
				J10	Normal	0

## Sheet: sample characteristics ST801a
-->catalognum	position	sex	age	organ	pathology	grade	image	type
ST801	A1	F	78	Stomach	Intramucosal carcinoma	I	http://www.biomax.us/tissue-array-image.php?catalognum=ST801&number=1	Malignant
ST801	A2	F	78	Stomach	Matched adjacent normal stomach tissue of the above	-	http://www.biomax.us/tissue-array-image.php?catalognum=ST801&number=2	Normal
ST801	A3	M	60	Stomach	Papillary adenocarcinoma	I	http://www.biomax.us/tissue-array-image.php?catalognum=ST801&number=3	Malignant
ST801	A4	M	60	Stomach	Matched adjacent normal stomach tissue of the above	-	http://www.biomax.us/tissue-array-image.php?catalognum=ST801&number=4	Normal
ST801	A5	M	67	Stomach	Stomach tissue	-	http://www.biomax.us/tissue-array-image.php?catalognum=ST801&number=5	Malignant
ST801	A6	M	67	Stomach	Matched adjacent normal stomach tissue of the above	-	http://www.biomax.us/tissue-array-image.php?catalognum=ST801&number=6	Normal
ST801	A7	M	48	Stomach	Adenocarcinoma	II	http://www.biomax.us/tissue-array-image.php?catalognum=ST801&number=7	Malignant
ST801	A8	M	48	Stomach	Matched adjacent normal stomach tissue of the above	-	http://www.biomax.us/tissue-array-image.php?catalognum=ST801&number=8	Normal
ST801	A9	F	59	Stomach	Adenocarcinoma	II	http://www.biomax.us/tissue-array-image.php?catalognum=ST801&number=9	Malignant
ST801	A10	F	59	Stomach	Matched adjacent normal stomach tissue of the above	-	http://www.biomax.us/tissue-array-image.php?catalognum=ST801&number=10	Normal
ST801	B1	F	51	Stomach	Papillary adenocarcinoma	I	http://www.biomax.us/tissue-array-image.php?catalognum=ST801&number=11	Malignant
ST801	B2	F	51	Stomach	Matched adjacent normal stomach tissue of the above	-	http://www.biomax.us/tissue-array-image.php?catalognum=ST801&number=12	Normal
ST801	B3	M	55	Stomach	Adenocarcinoma	II	http://www.biomax.us/tissue-array-image.php?catalognum=ST801&number=13	Malignant
ST801	B4	M	55	Stomach	Matched adjacent normal stomach tissue of the above	-	http://www.biomax.us/tissue-array-image.php?catalognum=ST801&number=14	Normal
ST801	B5	M	53	Stomach	Adenocarcinoma	II	http://www.biomax.us/tissue-array-image.php?catalognum=ST801&number=15	Malignant
ST801	B6	M	53	Stomach	Matched adjacent normal stomach tissue of the above	-	http://www.biomax.us/tissue-array-image.php?catalognum=ST801&number=16	Normal
ST801	B7	M	48	Stomach	Hyperplastic fibrous tissue	-	http://www.biomax.us/tissue-array-image.php?catalognum=ST801&number=17	Malignant
ST801	B8	M	48	Stomach	Matched adjacent normal stomach tissue of the above	-	http://www.biomax.us/tissue-array-image.php?catalognum=ST801&number=18	Normal
ST801	B9	F	68	Stomach	Adenocarcinoma	III	http://www.biomax.us/tissue-array-image.php?catalognum=ST801&number=19	Malignant
ST801	B10	F	68	Stomach	Matched adjacent normal stomach tissue of the above	-	http://www.biomax.us/tissue-array-image.php?catalognum=ST801&number=20	Normal
ST801	C1	M	74	Stomach	Adenocarcinoma	II	http://www.biomax.us/tissue-array-image.php?catalognum=ST801&number=21	Malignant
ST801	C2	M	74	Stomach	Matched adjacent normal stomach tissue of the above	-	http://www.biomax.us/tissue-array-image.php?catalognum=ST801&number=22	Normal
ST801	C3	M	68	Stomach	Adenocarcinoma	II	http://www.biomax.us/tissue-array-image.php?catalognum=ST801&number=23	Malignant
ST801	C4	M	68	Stomach	Matched adjacent normal stomach tissue of the above	-	http://www.biomax.us/tissue-array-image.php?catalognum=ST801&number=24	Normal
ST801	C5	M	51	Stomach	Papillary adenocarcinoma	II	http://www.biomax.us/tissue-array-image.php?catalognum=ST801&number=25	Malignant
ST801	C6	M	51	Stomach	Matched adjacent normal stomach tissue of the above	-	http://www.biomax.us/tissue-array-image.php?catalognum=ST801&number=26	Normal
ST801	C7	F	55	Stomach	Adenocarcinoma	III	http://www.biomax.us/tissue-array-image.php?catalognum=ST801&number=27	Malignant
ST801	C8	F	55	Stomach	Matched adjacent normal stomach tissue of the above	-	http://www.biomax.us/tissue-array-image.php?catalognum=ST801&number=28	Normal
ST801	C9	M	53	Stomach	Adenocarcinoma	II	http://www.biomax.us/tissue-array-image.php?catalognum=ST801&number=29	Malignant
ST801	C10	M	53	Stomach	Matched adjacent normal stomach tissue of the above	-	http://www.biomax.us/tissue-array-image.php?catalognum=ST801&number=30	Normal
ST801	D1	M	52	Stomach	Adenocarcinoma	III	http://www.biomax.us/tissue-array-image.php?catalognum=ST801&number=31	Malignant
ST801	D2	M	52	Stomach	Matched adjacent normal stomach tissue of the above	-	http://www.biomax.us/tissue-array-image.php?catalognum=ST801&number=32	Normal
ST801	D3	M	54	Stomach	Adenocarcinoma	II	http://www.biomax.us/tissue-array-image.php?catalognum=ST801&number=33	Malignant
ST801	D4	M	54	Stomach	Matched adjacent normal stomach tissue of the above	-	http://www.biomax.us/tissue-array-image.php?catalognum=ST801&number=34	Normal
ST801	D5	M	69	Stomach	Adenocarcinoma	III	http://www.biomax.us/tissue-array-image.php?catalognum=ST801&number=35	Malignant
ST801	D6	M	69	Stomach	Matched adjacent normal stomach tissue of the above	-	http://www.biomax.us/tissue-array-image.php?catalognum=ST801&number=36	Normal
ST801	D7	M	61	Stomach	Adenocarcinoma	II	http://www.biomax.us/tissue-array-image.php?catalognum=ST801&number=37	Malignant
ST801	D8	M	61	Stomach	Matched adjacent fibrofatty tissue	-	http://www.biomax.us/tissue-array-image.php?catalognum=ST801&number=38	Normal
ST801	D9	M	72	Stomach	Adenocarcinoma	III	http://www.biomax.us/tissue-array-image.php?catalognum=ST801&number=39	Malignant
ST801	D10	M	72	Stomach	Matched adjacent normal stomach tissue of the above	-	http://www.biomax.us/tissue-array-image.php?catalognum=ST801&number=40	Normal
ST801	E1	F	53	Stomach	Adenocarcinoma	III	http://www.biomax.us/tissue-array-image.php?catalognum=ST801&number=41	Malignant
ST801	E2	F	53	Stomach	Matched adjacent normal stomach tissue of the above	-	http://www.biomax.us/tissue-array-image.php?catalognum=ST801&number=42	Normal
ST801	E3	M	49	Stomach	Adenocarcinoma	II	http://www.biomax.us/tissue-array-image.php?catalognum=ST801&number=43	Malignant
ST801	E4	M	49	Stomach	Matched adjacent normal stomach tissue of the above	-	http://www.biomax.us/tissue-array-image.php?catalognum=ST801&number=44	Normal
ST801	E5	F	68	Stomach	Adenocarcinoma	III	http://www.biomax.us/tissue-array-image.php?catalognum=ST801&number=45	Malignant
ST801	E6	F	68	Stomach	Matched adjacent normal stomach tissue of the above	-	http://www.biomax.us/tissue-array-image.php?catalognum=ST801&number=46	Normal
ST801	E7	M	54	Stomach	Adenocarcinoma	III	http://www.biomax.us/tissue-array-image.php?catalognum=ST801&number=47	Malignant
ST801	E8	M	54	Stomach	Matched adjacent normal stomach tissue of the above	-	http://www.biomax.us/tissue-array-image.php?catalognum=ST801&number=48	Normal
ST801	E9	M	50	Stomach	Undifferentiated adenocarcinoma	IV	http://www.biomax.us/tissue-array-image.php?catalognum=ST801&number=49	Malignant
ST801	E10	M	50	Stomach	Matched adjacent normal stomach tissue of the above with intestinal metaplasia	-	http://www.biomax.us/tissue-array-image.php?catalognum=ST801&number=50	Normal
ST801	F1	F	63	Stomach	Undifferentiated adenocarcinoma	IV	http://www.biomax.us/tissue-array-image.php?catalognum=ST801&number=51	Malignant
ST801	F2	F	63	Stomach	Matched adjacent normal stomach tissue of the above	-	http://www.biomax.us/tissue-array-image.php?catalognum=ST801&number=52	Normal
ST801	F3	F	51	Stomach	Adenocarcinoma	III	http://www.biomax.us/tissue-array-image.php?catalognum=ST801&number=53	Malignant
ST801	F4	F	51	Stomach	Matched adjacent normal stomach tissue of the above	-	http://www.biomax.us/tissue-array-image.php?catalognum=ST801&number=54	Normal
ST801	F5	M	71	Stomach	Adenocarcinoma	III	http://www.biomax.us/tissue-array-image.php?catalognum=ST801&number=55	Malignant
ST801	F6	M	71	Stomach	Matched adjacent normal stomach tissue of the above	-	http://www.biomax.us/tissue-array-image.php?catalognum=ST801&number=56	Normal
ST801	F7	M	61	Stomach	Undifferentiated adenocarcinoma	IV	http://www.biomax.us/tissue-array-image.php?catalognum=ST801&number=57	Malignant
ST801	F8	M	61	Stomach	Matched adjacent normal stomach tissue of the above	-	http://www.biomax.us/tissue-array-image.php?catalognum=ST801&number=58	Normal
ST801	F9	M	47	Stomach	Undifferentiated adenocarcinoma	IV	http://www.biomax.us/tissue-array-image.php?catalognum=ST801&number=59	Malignant
ST801	F10	M	47	Stomach	Matched adjacent normal stomach tissue of the above	-	http://www.biomax.us/tissue-array-image.php?catalognum=ST801&number=60	Normal
ST801	G1	M	58	Stomach	Mucinous adenocarcinoma	III	http://www.biomax.us/tissue-array-image.php?catalognum=ST801&number=61	Malignant
ST801	G2	M	58	Stomach	Matched adjacent normal stomach tissue of the above	-	http://www.biomax.us/tissue-array-image.php?catalognum=ST801&number=62	Normal
ST801	G3	F	63	Stomach	Signet-ring cell carcinoma	-	http://www.biomax.us/tissue-array-image.php?catalognum=ST801&number=63	Malignant
ST801	G4	F	63	Stomach	Matched adjacent normal stomach tissue of the above	-	http://www.biomax.us/tissue-array-image.php?catalognum=ST801&number=64	Normal
ST801	G5	M	50	Stomach	Mucinous adenocarcinoma	I	http://www.biomax.us/tissue-array-image.php?catalognum=ST801&number=65	Malignant
ST801	G6	M	50	Stomach	Matched adjacent normal stomach tissue of the above	-	http://www.biomax.us/tissue-array-image.php?catalognum=ST801&number=66	Normal
ST801	G7	M	52	Stomach	Signet-ring cell carcinoma	-	http://www.biomax.us/tissue-array-image.php?catalognum=ST801&number=67	Malignant
ST801	G8	M	52	Stomach	Fibrous tissue	-	http://www.biomax.us/tissue-array-image.php?catalognum=ST801&number=68	Normal
ST801	G9	M	62	Stomach	Atypical carcinoid tumor	-	http://www.biomax.us/tissue-array-image.php?catalognum=ST801&number=69	Malignant
ST801	G10	M	62	Stomach	Matched adjacent normal stomach tissue of the above	-	http://www.biomax.us/tissue-array-image.php?catalognum=ST801&number=70	Normal
ST801	H1	F	52	Stomach	Adenocarcinoma	III	http://www.biomax.us/tissue-array-image.php?catalognum=ST801&number=71	Malignant
ST801	H2	F	52	Stomach	Matched adjacent normal stomach tissue of the above	-	http://www.biomax.us/tissue-array-image.php?catalognum=ST801&number=72	Normal
ST801	H3	F	54	Stomach	Adenocarcinoma	III	http://www.biomax.us/tissue-array-image.php?catalognum=ST801&number=73	Malignant
ST801	H4	F	54	Stomach	Matched adjacent normal stomach tissue of the above	-	http://www.biomax.us/tissue-array-image.php?catalognum=ST801&number=74	Normal
ST801	H5	M	64	Stomach	Signet-ring cell carcinoma	-	http://www.biomax.us/tissue-array-image.php?catalognum=ST801&number=75	Malignant
ST801	H6	M	64	Stomach	Matched adjacent normal stomach tissue of the above	-	http://www.biomax.us/tissue-array-image.php?catalognum=ST801&number=76	Normal
ST801	H7	M	73	Stomach	Signet-ring cell carcinoma	-	http://www.biomax.us/tissue-array-image.php?catalognum=ST801&number=77	Malignant
ST801	H8	M	73	Stomach	Matched adjacent normal stomach tissue of the above	-	http://www.biomax.us/tissue-array-image.php?catalognum=ST801&number=78	Normal
ST801	H9	M	50	Stomach	Carcinoid tumor	-	http://www.biomax.us/tissue-array-image.php?catalognum=ST801&number=79	Malignant
ST801	H10	M	50	Stomach	Matched adjacent normal stomach tissue of the above	-	http://www.biomax.us/tissue-array-image.php?catalognum=ST801&number=80	Normal

## Sheet: sample characteristics BC01114
-->catalognum	position	sex	age	organ	pathology	grade	stage	tnm	type
BC01114	A1	F	68	Stomach	Adenocarcinoma	3	II	T3N0M0	Malignant
BC01114	A2	F	68	Stomach	Cancer adjacent stomach tissue	-	-	-	NAT
BC01114	A3	M	59	Stomach	Adenocarcinoma	3	Ib	T2N0M0	Malignant
BC01114	A4	M	59	Stomach	Cancer adjacent stomach tissue (mucosal chronic inflammation)	-	-	-	NAT
BC01114	A5	F	65	Stomach	Adenocarcinoma	3	II	T3N0M0	Malignant
BC01114	A6	F	65	Stomach	Cancer adjacent stomach tissue (mucosal chronic inflammation)	-	-	-	NAT
BC01114	A7	M	65	Stomach	Adenocarcinoma	3	IIIa	T4N0M0	Malignant
BC01114	A8	M	65	Stomach	Cancer adjacent stomach tissue	-	-	-	NAT
BC01114	A9	M	60	Stomach	Adenocarcinoma	3	IIIb	T3N2M0	Malignant
BC01114	A10	M	60	Stomach	Cancer adjacent stomach tissue (blood vessel and fatty tissue)	-	-	-	NAT
BC01114	B1	F	34	Stomach	Adenocarcinoma	3	II	T2N1M0	Malignant
BC01114	B2	F	34	Stomach	Cancer adjacent gastric mucosa tissue	-	-	-	NAT
BC01114	B3	M	47	Stomach	Adenocarcinoma	3	II	T2N1M0	Malignant
BC01114	B4	M	47	Stomach	Cancer adjacent stomach tissue (chronic atrophic gastritis)	-	-	-	NAT
BC01114	B5	F	73	Stomach	Signet-ring cell carcinoma	-	II	T2N1M0	Malignant
BC01114	B6	F	73	Stomach	Cancer adjacent stomach tissue (fibrous tissue, blood vessel and fatty tissue)	-	-	-	NAT
BC01114	B7	M	67	Stomach	Adenocarcinoma	3	II	T3N0M0	Malignant
BC01114	B8	M	67	Stomach	Cancer adjacent stomach tissue	-	-	-	NAT
BC01114	B9	M	54	Stomach	Adenocarcinoma with tumoral noecrosis	3	Ib	T2N0M0	Malignant
BC01114	B10	M	54	Stomach	Cancer adjacent stomach tissue	-	-	#VALUE!	NAT
BC01114	C1	M	53	Stomach	Adenocarcinoma	3	II	T3N0M0	Malignant
BC01114	C2	M	53	Stomach	Cancer adjacent gastric mucosa tissue	-	-	-	NAT
BC01114	C3	M	70	Stomach	Adenocarcinoma	3	II	T3N0M0	Malignant
BC01114	C4	M	70	Stomach	Cancer adjacent stomach tissue (mucosal chronic inflammation)	-	-	-	NAT
BC01114	C5	M	55	Stomach	Adenocarcinoma	3	II	T3N0M0	Malignant
BC01114	C6	M	55	Stomach	Cancer adjacent stomach tissue (mucosal chronic inflammation)	-	-	-	NAT
BC01114	C7	F	42	Stomach	Adenocarcinoma (mucosal chronic inflammation)	-	IIIa	T4N0M0	Malignant
BC01114	C8	F	42	Stomach	Cancer adjacent gastric mucosa tissue	-	-	-	NAT
BC01114	C9	M	30	Stomach	Adenocarcinoma	3	II	T3N0M0	Malignant
BC01114	C10	M	30	Stomach	Cancer adjacent stomach tissue (mucosal chronic inflammation)	-	-	-	NAT
BC01114	D1	M	51	Stomach	Adenocarcinoma	3	IIIa	T3N1M0	Malignant
BC01114	D2	M	51	Stomach	Cancer adjacent stomach tissue	-	-	-	NAT
BC01114	D3	M	53	Stomach	Adenocarcinoma (sparse)	3	II	T3N0M0	Malignant
BC01114	D4	M	53	Stomach	Cancer adjacent stomach tissue (mucosal chronic inflammation)	-	-	-	NAT
BC01114	D5	M	55	Stomach	Adenocarcinoma	3	II	T3N0M0	Malignant
BC01114	D6	M	55	Stomach	Cancer adjacent stomach tissue (mucosal chronic inflammation)	-	-	-	NAT
BC01114	D7	M	74	Stomach	Adenocarcinoma	3	IIIa	T3N1M0	Malignant
BC01114	D8	M	74	Stomach	Cancer adjacent stomach tissue (mucosal chronic inflammation)	-	-	-	NAT
BC01114	D9	M	55	Stomach	Adenocarcinoma	3	II	T2N1M0	Malignant
BC01114	D10	M	55	Stomach	Cancer adjacent stomach tissue (mucosal chronic inflammation)	-	-	-	NAT
BC01114	E1	F	78	Stomach	Adenocarcinoma	3	Ib	T2N0M0	Malignant
BC01114	E2	F	78	Stomach	Cancer adjacent stomach tissue	-	-	-	NAT
BC01114	E3	M	44	Stomach	Adenocarcinoma	3	II	T3N0M0	Malignant
BC01114	E4	M	44	Stomach	Cancer adjacent gastric mucosa tissue	-	-	-	NAT
BC01114	E5	M	47	Stomach	Adenocarcinoma	3	IIIb	T3N2M0	Malignant
BC01114	E6	M	47	Stomach	Cancer adjacent stomach tissue (chronic atrophic gastritis with intestinal metaplasia)	-	-	-	NAT
BC01114	E7	M	65	Stomach	Adenocarcinoma (mucosal chronic inflammation)	-	Ib	T2N0M0	Malignant
BC01114	E8	M	65	Stomach	Cancer adjacent stomach tissue (mucosal chronic inflammation)	-	-	-	NAT
BC01114	E9	M	56	Stomach	Adenocarcinoma	3	IIIa	T3N1M0	Malignant
BC01114	E10	M	56	Stomach	Cancer adjacent stomach tissue (chronic atrophic gastritis)	-	-	-	NAT
BC01114	F1	M	76	Stomach	Adenocarcinoma (sparse)	2	II	T3N0M0	Malignant
BC01114	F2	M	76	Stomach	Cancer adjacent stomach tissue (sparse)	-	-	-	NAT
BC01114	F3	M	75	Stomach	Adenocarcinoma	2	IIIa	T3N1M0	Malignant
BC01114	F4	M	75	Stomach	Cancer adjacent stomach tissue (mucosal chronic inflammation)	-	-	-	NAT
BC01114	F5	F	57	Stomach	Adenocarcinoma (smooth muscle and blood vessel tissue)	-	Ib	T2N0M0	Malignant
BC01114	F6	F	57	Stomach	Cancer adjacent stomach tissue (mucosal chronic inflammation)	-	-	-	NAT
BC01114	F7	F	60	Stomach	Adenocarcinoma (smooth muscle chronic inflammation)	-	II	T2N1M0	Malignant
BC01114	F8	F	60	Stomach	Cancer adjacent stomach tissue (fibrofatty tissue)	-	-	-	NAT
BC01114	F9	M	69	Stomach	Adenocarcinoma	3	II	T3N0M0	Malignant
BC01114	F10	M	69	Stomach	Cancer adjacent stomach tissue (mucosal chronic inflammation)	-	-	-	NAT
BC01114	G1	M	56	Stomach	Adenocarcinoma	2	II	T3N0M0	Malignant
BC01114	G2	M	56	Stomach	Cancer adjacent stomach tissue	-	-	-	NAT
BC01114	G3	M	64	Stomach	Adenocarcinoma	2	II	T2N1M0	Malignant
BC01114	G4	M	64	Stomach	Cancer adjacent gastric mucosa tissue (sparse)	-	-	-	NAT
BC01114	G5	F	70	Stomach	Adenocarcinoma	2	II	T3N0M0	Malignant
BC01114	G6	F	70	Stomach	Cancer adjacent stomach tissue	-	-	-	NAT
BC01114	G7	M	48	Stomach	Adenocarcinoma	1	II	T3N0M0	Malignant
BC01114	G8	M	48	Stomach	Cancer adjacent stomach tissue	-	-	-	NAT
BC01114	G9	M	53	Stomach	Adenocarcinoma	2	II	T3N0M0	Malignant
BC01114	G10	M	53	Stomach	Cancer adjacent stomach tissue	-	-	-	NAT
BC01114	H1	M	75	Stomach	Adenocarcinoma	1	Ib	T2N0M0	Malignant
BC01114	H2	M	75	Stomach	Cancer adjacent stomach tissue	-	-	-	NAT
BC01114	H3	M	58	Stomach	Adenocarcinoma	1	II	T3N0M0	Malignant
BC01114	H4	M	58	Stomach	Cancer adjacent stomach tissue (atypical hyperplasia with canceration of epithelium mucosae)	-	-	-	NAT
BC01114	H5	M	48	Stomach	Mucinous adenocarcinoma	1	II	T3N0M0	Malignant
BC01114	H6	M	48	Stomach	Cancer adjacent stomach tissue (mucosal chronic inflammation)	-	-	-	NAT
BC01114	H7	F	49	Stomach	Adenocarcinoma	1	II	T3N0M0	Malignant
BC01114	H8	F	49	Stomach	Cancer adjacent stomach tissue (mucosal chronic inflammation)	-	-	-	NAT
BC01114	H9	F	48	Stomach	Adenocarcinoma	1	II	T3N0M0	Malignant
BC01114	H10	F	48	Stomach	Cancer adjacent stomach tissue	-	-	-	NAT
BC01114	I1	M	58	Stomach	Adenocarcinoma	1--2	II	T3N0M0	Malignant
BC01114	I2	M	58	Stomach	Cancer adjacent stomach tissue	-	-	-	NAT
BC01114	I3	M	68	Stomach	Adenocarcinoma	1	II	T3N0M0	Malignant
BC01114	I4	M	68	Stomach	Cancer adjacent stomach tissue (mucosal chronic inflammation)	-	-	-	NAT
BC01114	I5	M	61	Stomach	Adenocarcinoma	1--2	Ib	T2N0M0	Malignant
BC01114	I6	M	61	Stomach	Cancer adjacent stomach tissue (mucosal chronic inflammation)	-	-	-	NAT
BC01114	I7	F	71	Stomach	Adenocarcinoma	1	Ib	T2N0M0	Malignant
BC01114	I8	F	71	Stomach	Cancer adjacent gastric mucosa tissue	-	-	-	NAT
BC01114	I9	M	66	Stomach	Adenocarcinoma	1--2	Ib	T2N0M0	Malignant
BC01114	I10	M	66	Stomach	Cancer adjacent stomach tissue	-	-	-	NAT
BC01114	J1	M	40	Stomach	Normal gastric mucosa tissue	-	-	-	Normal
BC01114	J2	M	35	Stomach	Normal gastric mucosa tissue	-	-	-	Normal
BC01114	J3	M	35	Stomach	Normal stomach tissue	-	-	-	Normal
BC01114	J4	M	35	Stomach	Normal stomach tissue	-	-	-	Normal
BC01114	J5	M	50	Stomach	Normal stomach tissue	-	-	-	Normal
BC01114	J6	M	25	Stomach	Normal stomach tissue	-	-	-	Normal
BC01114	J7	F	38	Stomach	Normal stomach tissue (sparse)	-	-	-	Normal
BC01114	J8	M	48	Stomach	Normal stomach tissue	-	-	-	Normal
BC01114	J9	M	45	Stomach	Normal stomach tissue	-	-	-	Normal
BC01114	J10	M	16	Stomach	Normal gastric mucosa tissue	-	-	-	Normal
